# Supplementary material for: Somatic mutagenesis in satellite cells associates with human skeletal muscle aging
Source: PubMed Central journal article supplement (PMC5824957; doi:10.1038/s41467-018-03244-6), 2018-02-23
Supplement: 41467_2018_3244_MOESM3_ESM.pdf [file 41467_2018_3244_MOESM3_ESM.pdf]

## **Description of Additional Supplementary Files**

File Name: Supplementary Data 1

Description: Filtered somatic mutations in young human satellite cells

File Name: Supplementary Data 2

Description: Filtered somatic mutations in old human satellite cells

File Name: Supplementary Data 3

Description: Filtered somatic mutations in long-cultured human satellite cells
